# Supplementary material for: Phocoenamicins B and C, New Antibacterial Spirotetronates Isolated from a Marine Micromonospora sp
Source: PubMed Central journal article supplement (PMC5867639; doi:10.3390/md16030095), 2018-03-16
Supplement: marinedrugs-16-00095-s001.pdf [file marinedrugs-16-00095-s001.pdf]

# Phocoenamicins B and C, new antibacterial spirotetronates from the Marine Actinomycete *Micromonospora chaiyaphumensis*

Mercedes Pérez-Bonilla\*, Daniel Oves-Costales, Mercedes de la Cruz, Maria Kokkini, Jesús Martín, Francisca Vicente, Olga Genilloud and Fernando Reyes\*

Fundación MEDINA, Centro de Excelencia en Investigación de Medicamentos Innovadores en Andalucía. Parque Tecnológico Ciencias de la Salud. Avda. del Conocimiento 34, 18016, Armilla, Granada, Spain; [daniel.oves@medinaandalucia.es](mailto:daniel.oves@medinaandalucia.es) (D.O.-C.); [mercedes.delacruz@medinaandalucia.es](mailto:mercedes.delacruz@medinaandalucia.es) (M.d.l.C.); [maria.kokkini@medinaandalucia.es](mailto:maria.kokkini@medinaandalucia.es) (M.K.); [jesus.martin@medinaandalucia.es](mailto:jesus.martin@medinaandalucia.es) (J.M.); [francisca.vicente@medinaandalucia.es](mailto:francisca.vicente@medinaandalucia.es) (F.V.); [olga.genilloud@medinaandalucia.es](mailto:olga.genilloud@medinaandalucia.es) (O.G.)

\* Correspondence: [mercedes.perez@medinaandalucia.es](mailto:mercedes.perez@medinaandalucia.es) (M.P.-B.); [fernando.reyes@medinaandalucia.es](mailto:fernando.reyes@medinaandalucia.es) (F.R.)  
Tel.: +34-958-993-965 (F.R.)

## Contents:

**Figure S1.**  $^1\text{H}$ - $^1\text{H}$  COSY and key HMBC correlations for **2**.

**Figure S2.** Conformation and configuration of the decalin, cyclohexene and sugars moieties of **2** determined by NOESY data and  $J$ -based analysis.

**Text S3.** 16S rRNA gene sequence from strain CA-214671.

**Table S4.** NMR spectroscopic data (500 Mz,  $\text{CD}_3\text{OD}$ ) for phocoenamicin (**3**).

**Figure S5.**  $^1\text{H}$ -NMR (500 MHz, methanol- $d_4$ ) spectrum of phocoenamicin B (**1**).

**Figure S6.**  $^{13}\text{C}$ -NMR (125 MHz, methanol- $d_4$ ) spectrum of phocoenamicin B (**1**).

**Figure S7.** HSQC (methanol- $d_4$ ) spectrum of phocoenamicin B (**1**).

**Figure S8.** HMBC (methanol- $d_4$ ) spectrum of phocoenamicin B (**1**).

**Figure S9.** COSY (methanol- $d_4$ ) spectrum of phocoenamicin B (**1**).

**Figure S10.** NOESY (methanol- $d_4$ ) spectrum of phocoenamicin B (**1**).

**Figure S11.** TOCSY (methanol- $d_4$ ) spectrum of phocoenamicin B (**1**).

**Figure S12.**  $^1\text{H}$ -NMR (500 MHz, methanol- $d_4$ ) spectrum of phocoenamicin C (**2**).

**Figure S13.**  $^{13}\text{C}$ -NMR (125 MHz, methanol- $d_4$ ) spectrum of phocoenamicin C (**2**).

**Figure S14.** HSQC (methanol- $d_4$ ) spectrum of phocoenamicin C (**2**).

**Figure S15.** HMBC (methanol- $d_4$ ) spectrum of phocoenamicin C (**2**).

**Figure S16.** COSY (methanol- $d_4$ ) spectrum of phocoenamicin C (**2**).

**Figure S17.** NOESY (methanol- $d_4$ ) spectrum of phocoenamicin C (**2**).

**Figure S18.** TOCSY (methanol- $d_4$ ) spectrum of phocoenamicin C (**2**).

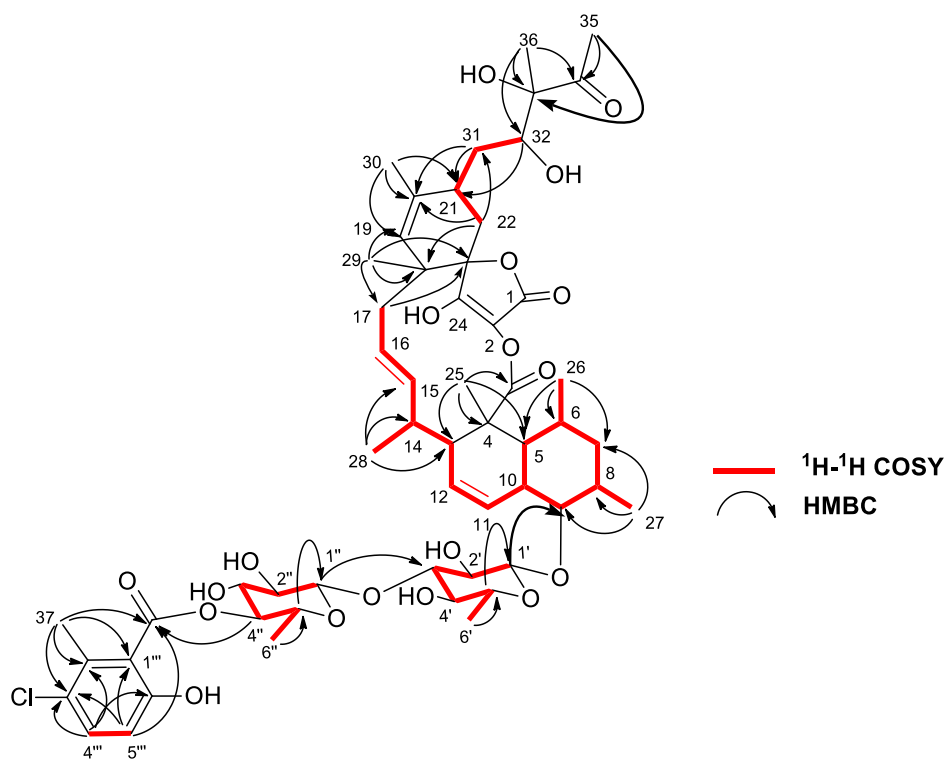

**Figure S1.**  $^1\text{H}$ - $^1\text{H}$  COSY and key HMBC correlations for **2**.

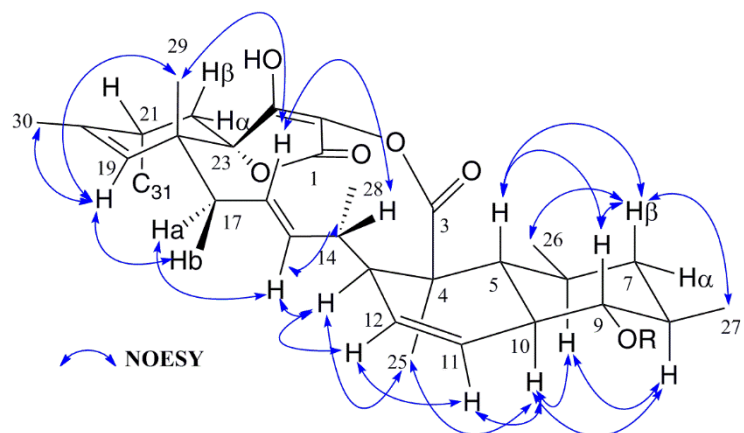

(S2.a)

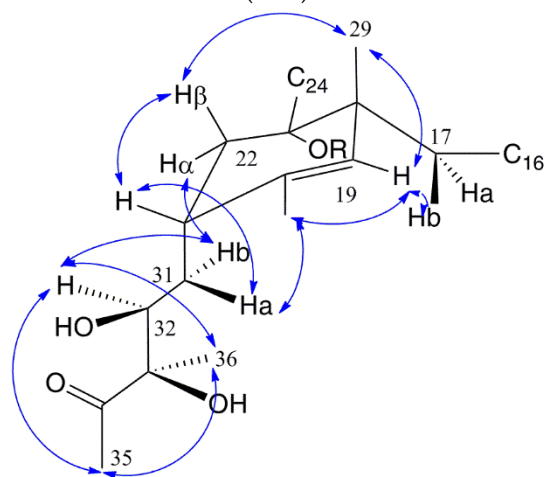

(S2.b)

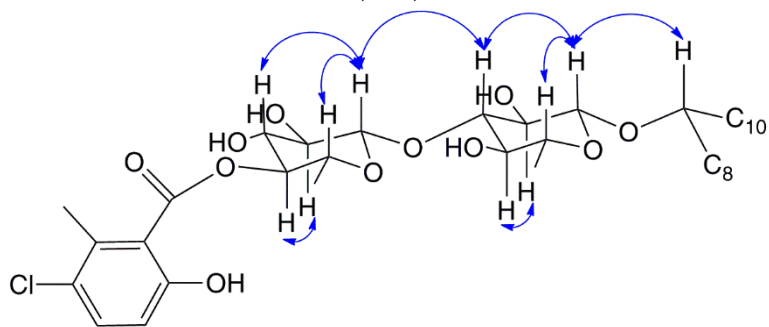

(S2.c)

**Figure S2.** Conformation and configuration of the decalin, cyclohexene and sugars moieties of **2** determined by NOESY data and *J*-based analysis.

**Text S3.** 16S rRNA gene sequence from strain CA-214671.

cgacttcgtccaatcgccagccccaccttcgacggctcctccacaaggggtggccaccggcttcgggtgttccgacttctgtgacgtgacg  
ggcgggtgtgtacaaggcccgggaacgtattaccgcagcgttgctgatctgcgattactagcgcactccgacttcacggggtcgagttgcagac  
cccgatccgaactgagaccggcttttgggattcgctccacctcaggtatcgagccattgtaccggccattgtagcatgcgtgaagccctgg  
acataaggggcatgatgacttgacgtcatccccaccttctccgagttgaccccgagcttctgatgagtcgccataacgcgctggaaca  
tcgaacgaggggtgcgctcgttcgggacttaaccaacatctcacgacagctgacgacagccatgaccacctgtgaccgcccgaag  
gacctscatctctgncagtttgcggccatgtcaaaccaggtaaggttcttcgcttgcatcgaattaatccgcatgctccgcccgttgcgg  
gccccgtcaattcctttgagtttagccttgcggccgtactccccaggcggggcgcttaatgcgttagctgcggcacagrgaacgggagaggc  
ccccacacctagcgcacaacgtttacagcgtggactaccagggtatctaactctgttcgctccccacgcttctcctcagcgtcagtatcgcc  
cagagaccgccttcgccaccggtgttctcctgatctgcgcatcaccgctacaccaggaattccagtctccccaccgaacttagcctgcc  
cgtatcgactgcaggcccagttgagctgcgggtttcacagtcgacgcgacaagccgctacgagctctttacgccataataatccggacia  
cgctcgcgcctcagcttaccgcggtgctggcacgtagttggccggcgcttctctcaggtaccgtcacttacgcttctcctgctgaaaga  
ggtttacaaccegaaggccgtatccctcacggcgctgctgcatcaggcttccgccattgtgcaatattccccactgctcctcccgtaggag  
tctgggcccgtgtcagtcaccagtggtggccgctcgcctctcagggccgctaccgctcgtcgccttggtaggccatccccaccaacaagctga  
taggccgagccccatcccaggccgaaaaactttccaccccaaccatgacggtc

**Table S4.** NMR spectroscopic data (500 Mz, CD<sub>3</sub>OD) for phocoenamycin (3).

| phocoenamycin (3) |                       |                       |
|-------------------|-----------------------|-----------------------|
| Position          | $\delta_C$ , type     | $\delta_H$ (J in Hz)  |
| 1                 | 177.8, C              |                       |
| 2                 | 107.3, C              |                       |
| 3                 | 200.1, C              |                       |
| 4                 | 50.9, C               |                       |
| 5                 | 43.6, CH              | 1.82, m               |
| 6                 | 39.5, CH              | 1.49, m               |
| 7 $\alpha$        | 45.7, CH <sub>2</sub> | 1.72, m               |
| 7 $\beta$         |                       | 1.21, m               |
| 8                 | 40.9, CH              | 1.64, m               |
| 9                 | 88.6, CH              | 3.04, t (9.7)         |
| 10                | 48.4, CH              | 1.97, m               |
| 11                | 126.0, CH             | 6.29, d (10.0)        |
| 12                | 126.7, CH             | 5.57, dd (10.0, 6.2)  |
| 13                | 43.0, CH              | 2.67, *               |
| 14                | 40.0, CH              | 2.05, m               |
| 15                | 144.1, CH             | 5.36, dd (15.1, 9.1)  |
| 16                | 123.2, CH             | 5.14, dd (15.1, 10.4) |
| 17a               | 44.0, CH <sub>2</sub> | 2.31, m               |
| 17b               |                       | 1.86, m               |
| 18                | 41.2, C               |                       |
| 19                | 132.1, CH             | 5.02, s               |
| 20                | 134.6, C              |                       |
| 21                | 34.3, CH              | 2.37, m               |
| 22 $\alpha$       | 30.3, CH <sub>2</sub> | 2.28, m               |
| 22 $\beta$        |                       | 1.71, m               |
| 23                | 87.5, C               |                       |
| 24                | 205.7, C              |                       |
| 25                | 17.0, CH <sub>3</sub> | 1.59, s               |
| 26                | 23.7, CH <sub>3</sub> | 0.82, brs             |
| 27                | 20.1, CH <sub>3</sub> | 1.03, d (6.2)         |

|      |                       |                |
|------|-----------------------|----------------|
| 28   | 21.5, CH <sub>3</sub> | 0.82, brs      |
| 29   | 24.7, CH <sub>3</sub> | 1.23, brs      |
| 30   | 22.3, CH <sub>3</sub> | 1.74, s        |
| 31a  |                       | 1.95, m        |
| 31b  | 33.7, CH <sub>2</sub> | 1.74, m        |
| 32   | 74.0, CH              | 3.82, d (10.6) |
| 33   | 83.4, C               |                |
| 34   | 215.4, C              |                |
| 35   | 25.7, CH <sub>3</sub> | 2.24, s        |
| 36   | 22.2, CH <sub>3</sub> | 1.22, s        |
| 1'   | 104.0, CH             | 4.35, d (6.2)  |
| 2'   | 75.3, CH              | 3.45, m        |
| 3'   | 88.6, CH              | 3.46, m        |
| 4'   | 75.6, CH              | 3.11, t (8.7)  |
| 5'   | 72.9, CH              | 3.22, m        |
| 6'   | 18.4, CH <sub>3</sub> | 1.27, d (6.0)  |
| 1''  | 105.4, CH             | 4.61, d (7.8)  |
| 2''  | 76.0, CH              | 3.42, t (8.6)  |
| 3''  | 75.3, CH              | 3.65, t (9.7)  |
| 4''  | 77.9, CH              | 4.89, *        |
| 5''  | 71.7, CH              | 3.68, m        |
| 6''  | 18.0, CH <sub>3</sub> | 1.36, d (6.2)  |
| 1''' | 124.3, C              |                |
| 2''' | 135.6, C              |                |
| 3''' | 126.0, C              |                |
| 4''' | 132.4, CH             | 7.25, d (8.7)  |
| 5''' | 115.8, CH             | 6.70, d (8.7)  |
| 6''' | 155.3, C              |                |
| 7''' | 169.3, C              |                |
| 37   | 17.9, CH <sub>3</sub> | 2.36, s        |

---

\*Multiplicity not clear, the signal is overlapped.



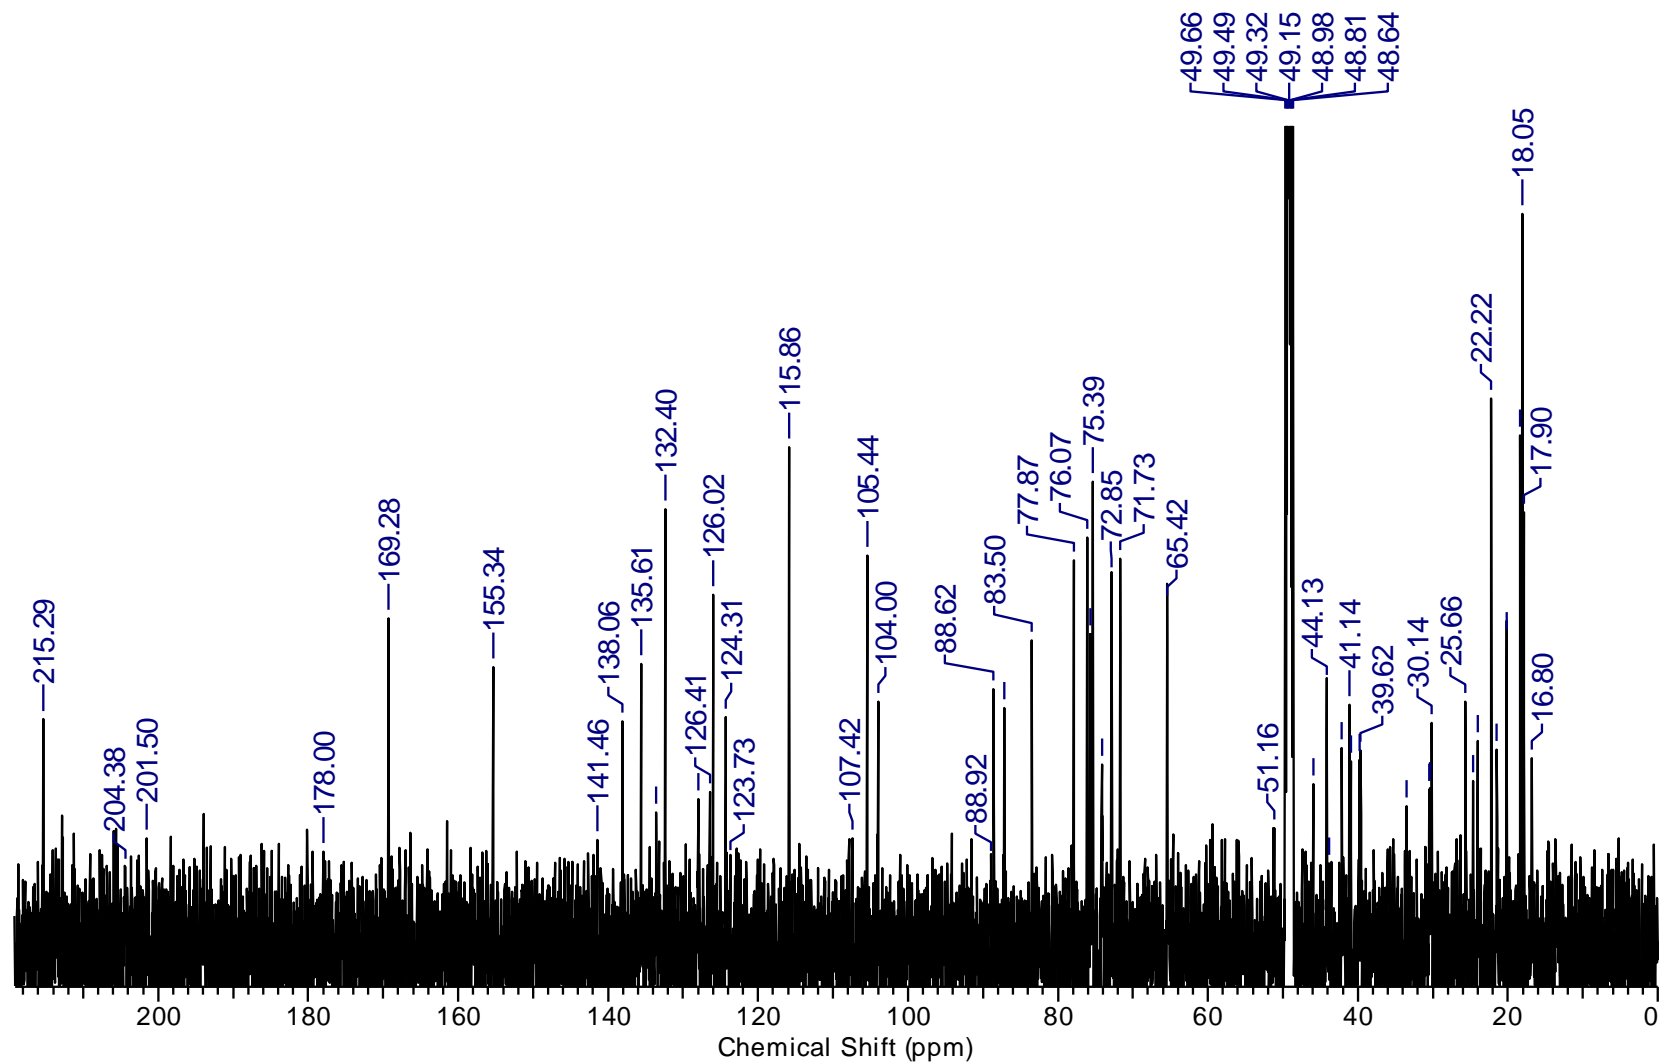

Figure S6.  $^{13}\text{C}$ -NMR (125 MHz, methanol- $d_4$ ) spectrum of phocoenamicin B (1).

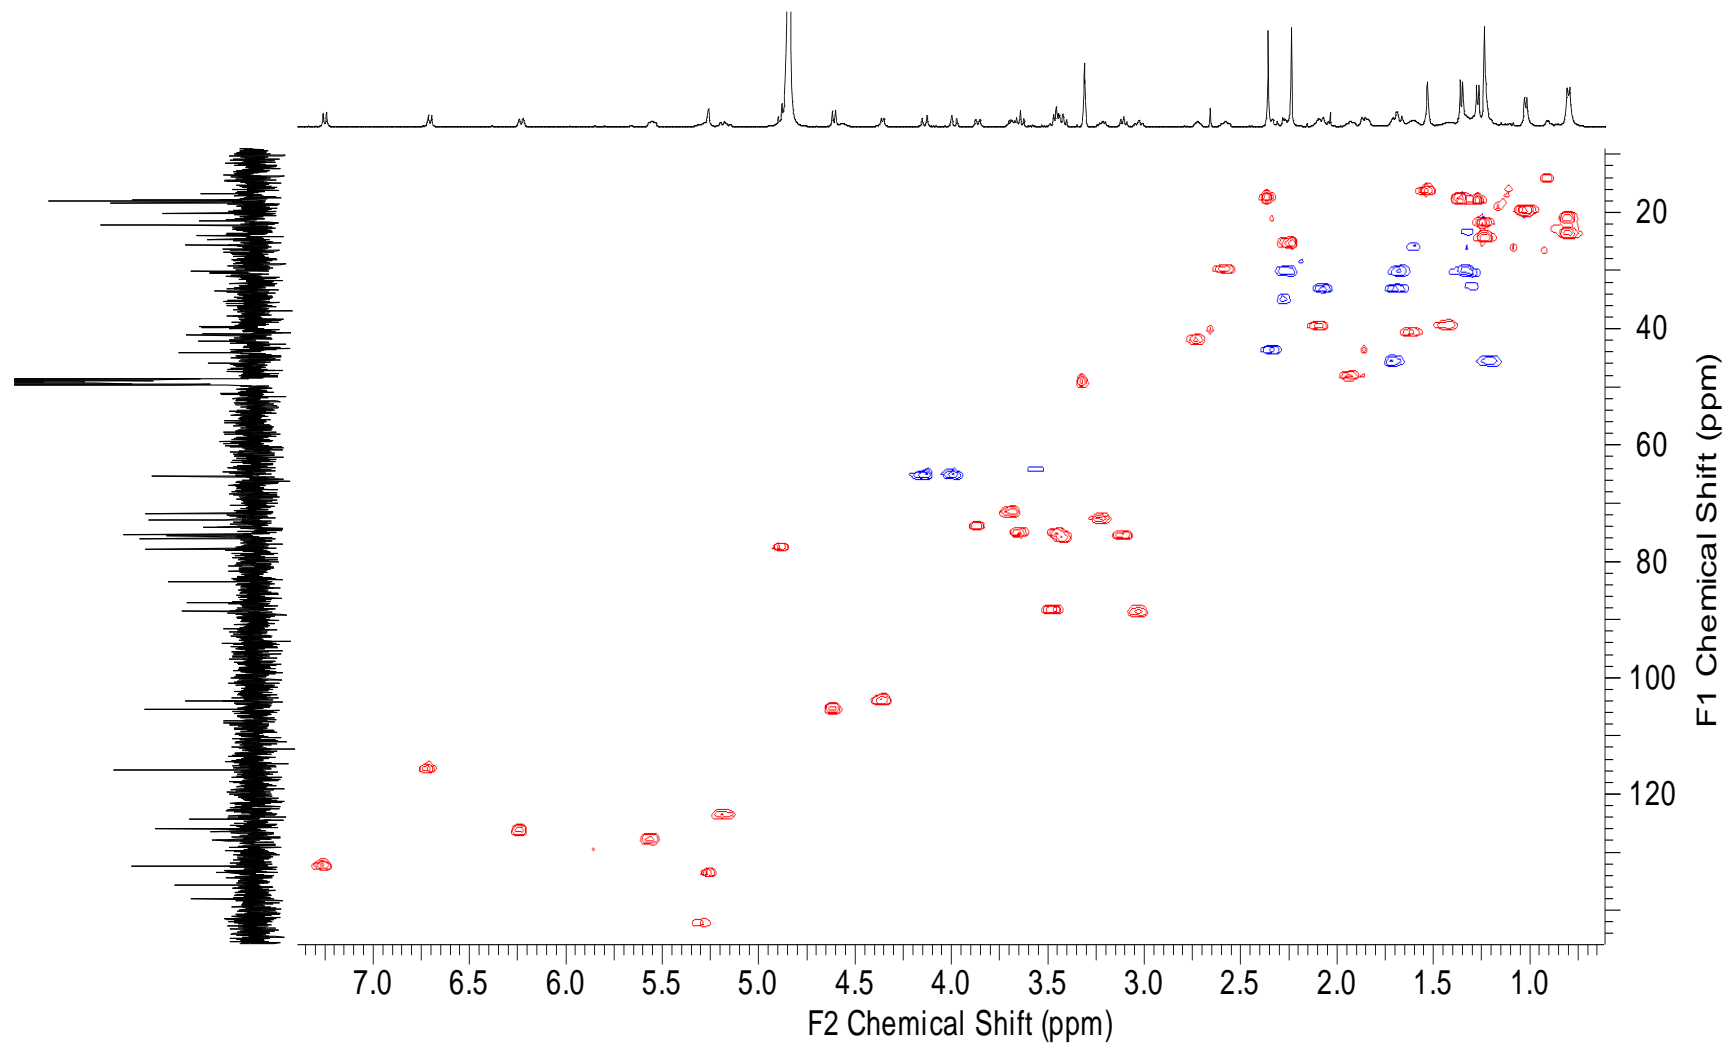

Figure S7. HSQC (methanol-*d*<sub>4</sub>) spectrum of phocoenamycin B (1).



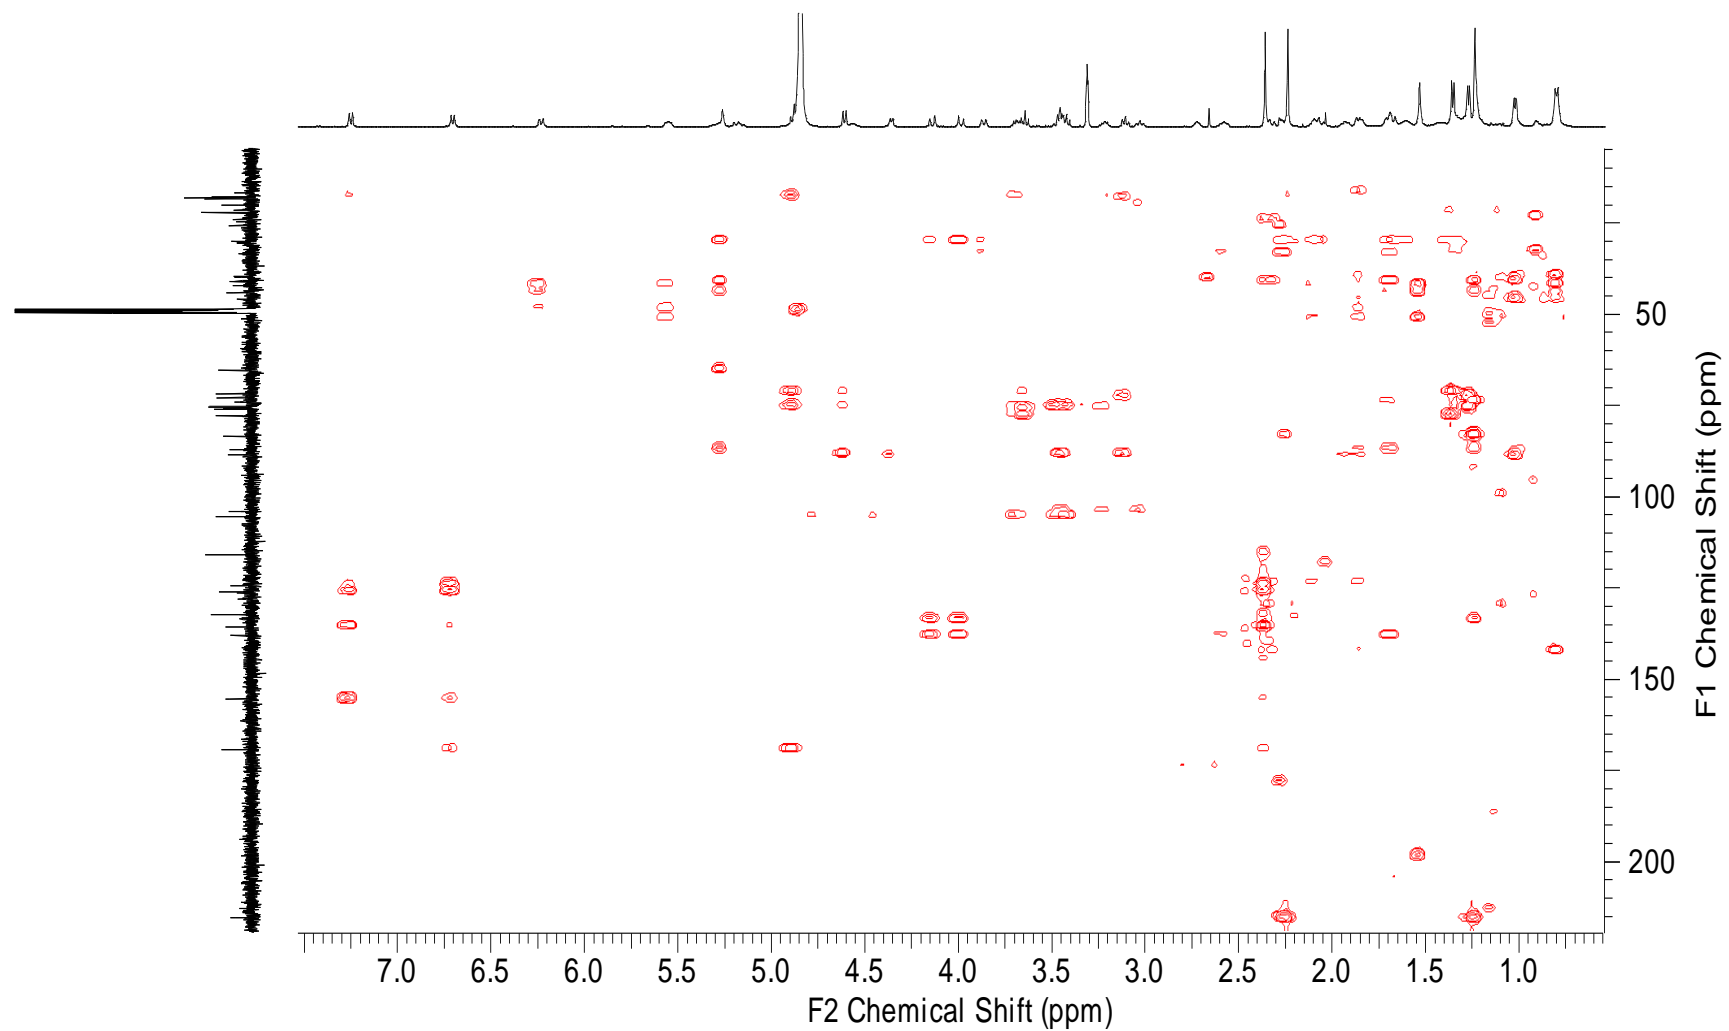

Figure S8. HMBC (methanol- $d_4$ ) spectrum of phocoenamycin B (1).

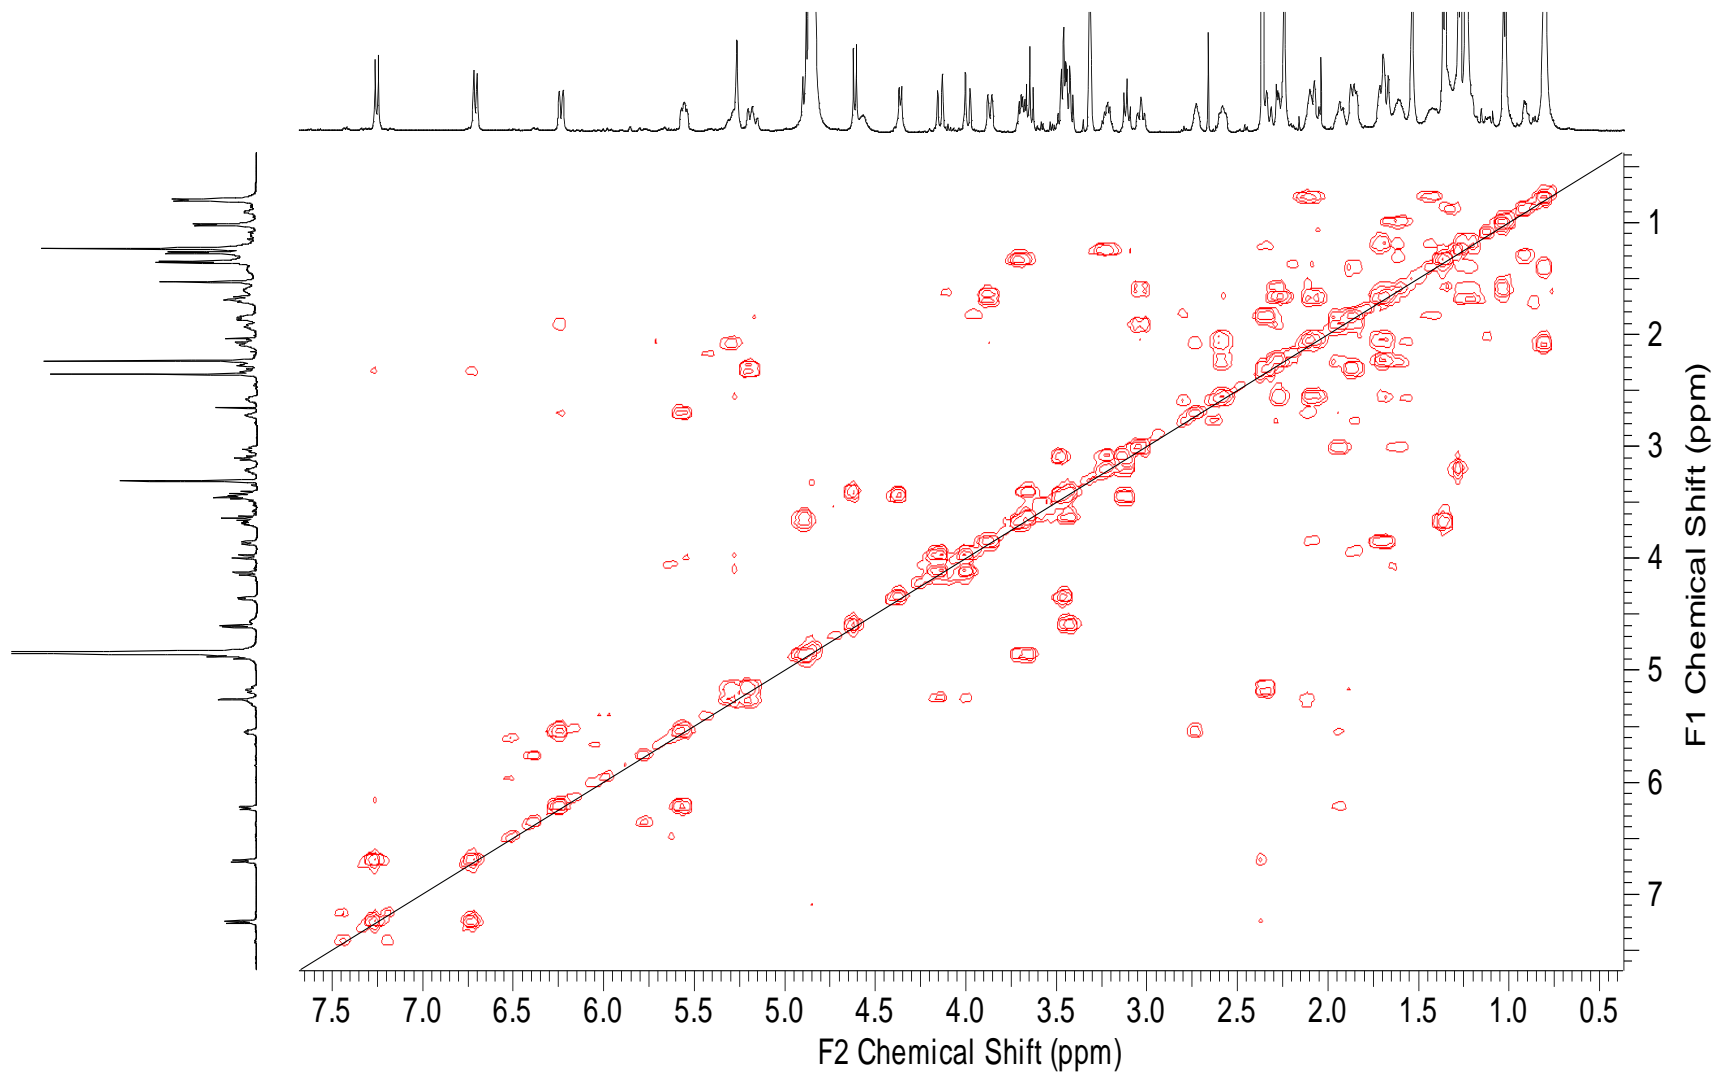

**Figure S9.** COSY (methanol-*d*<sub>4</sub>) spectrum of phocoenamycin B (**1**).

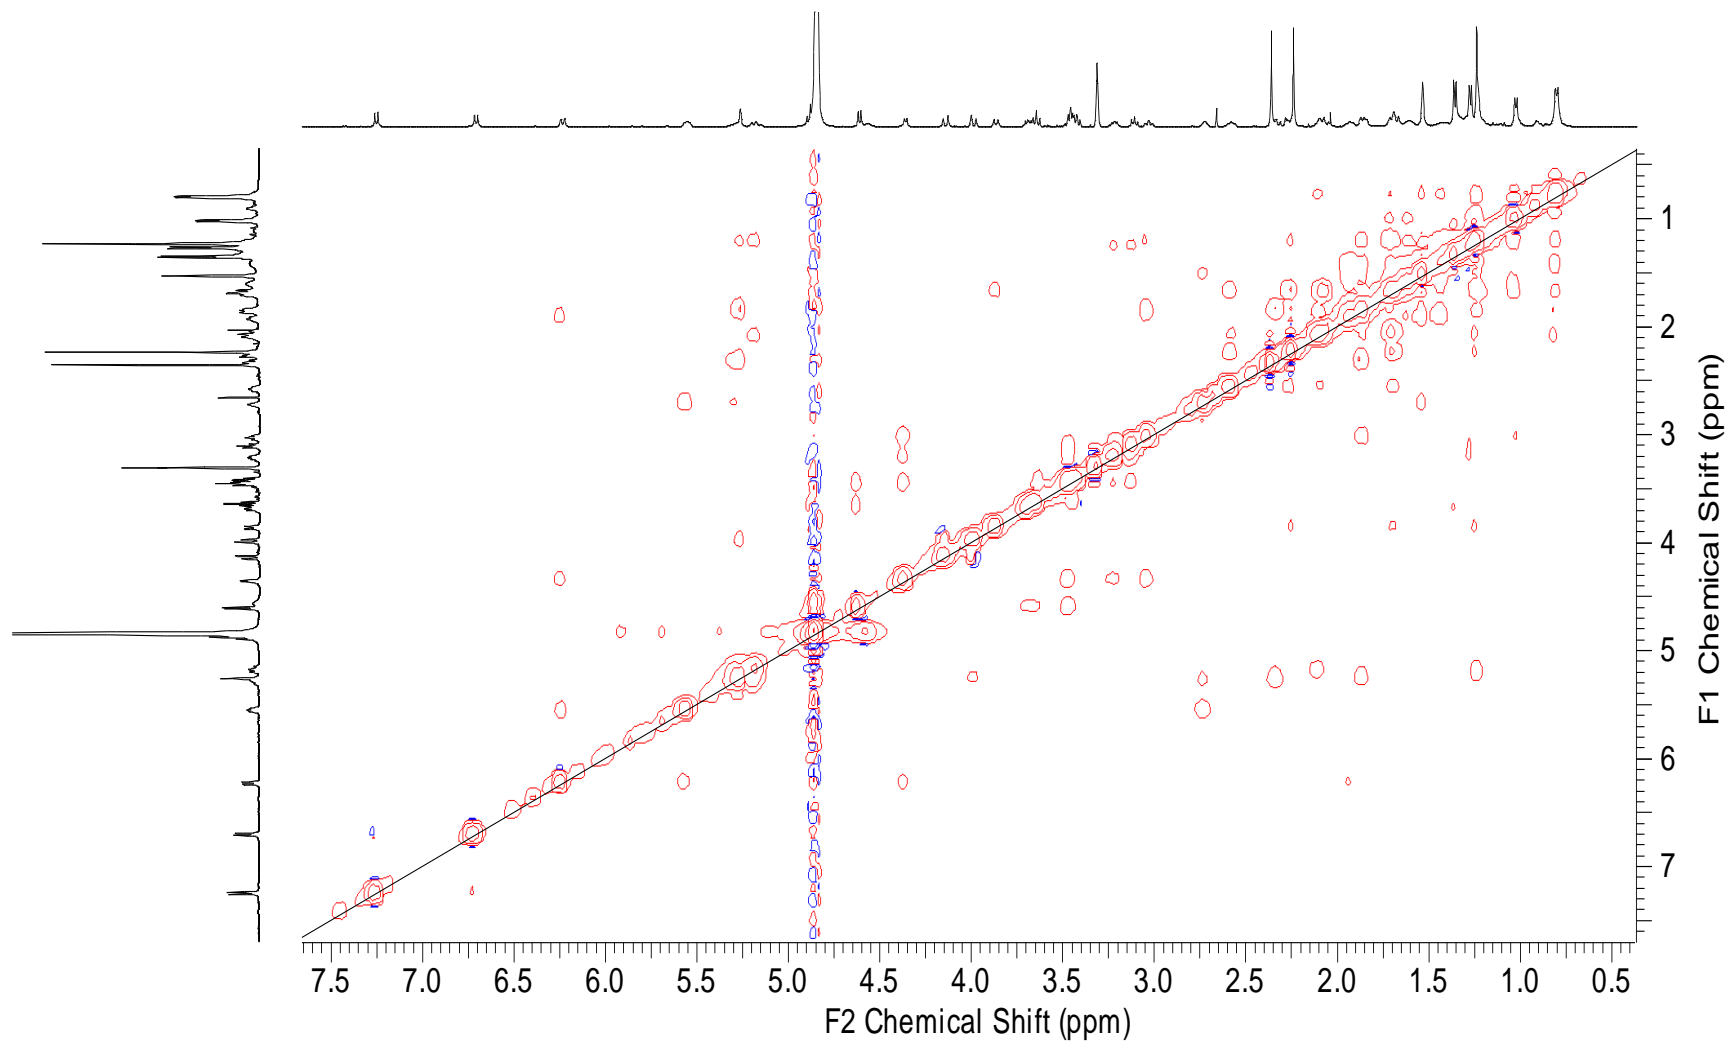

**Figure S10.** NOESY (methanol- $d_4$ ) spectrum of phocoenamycin B (1).

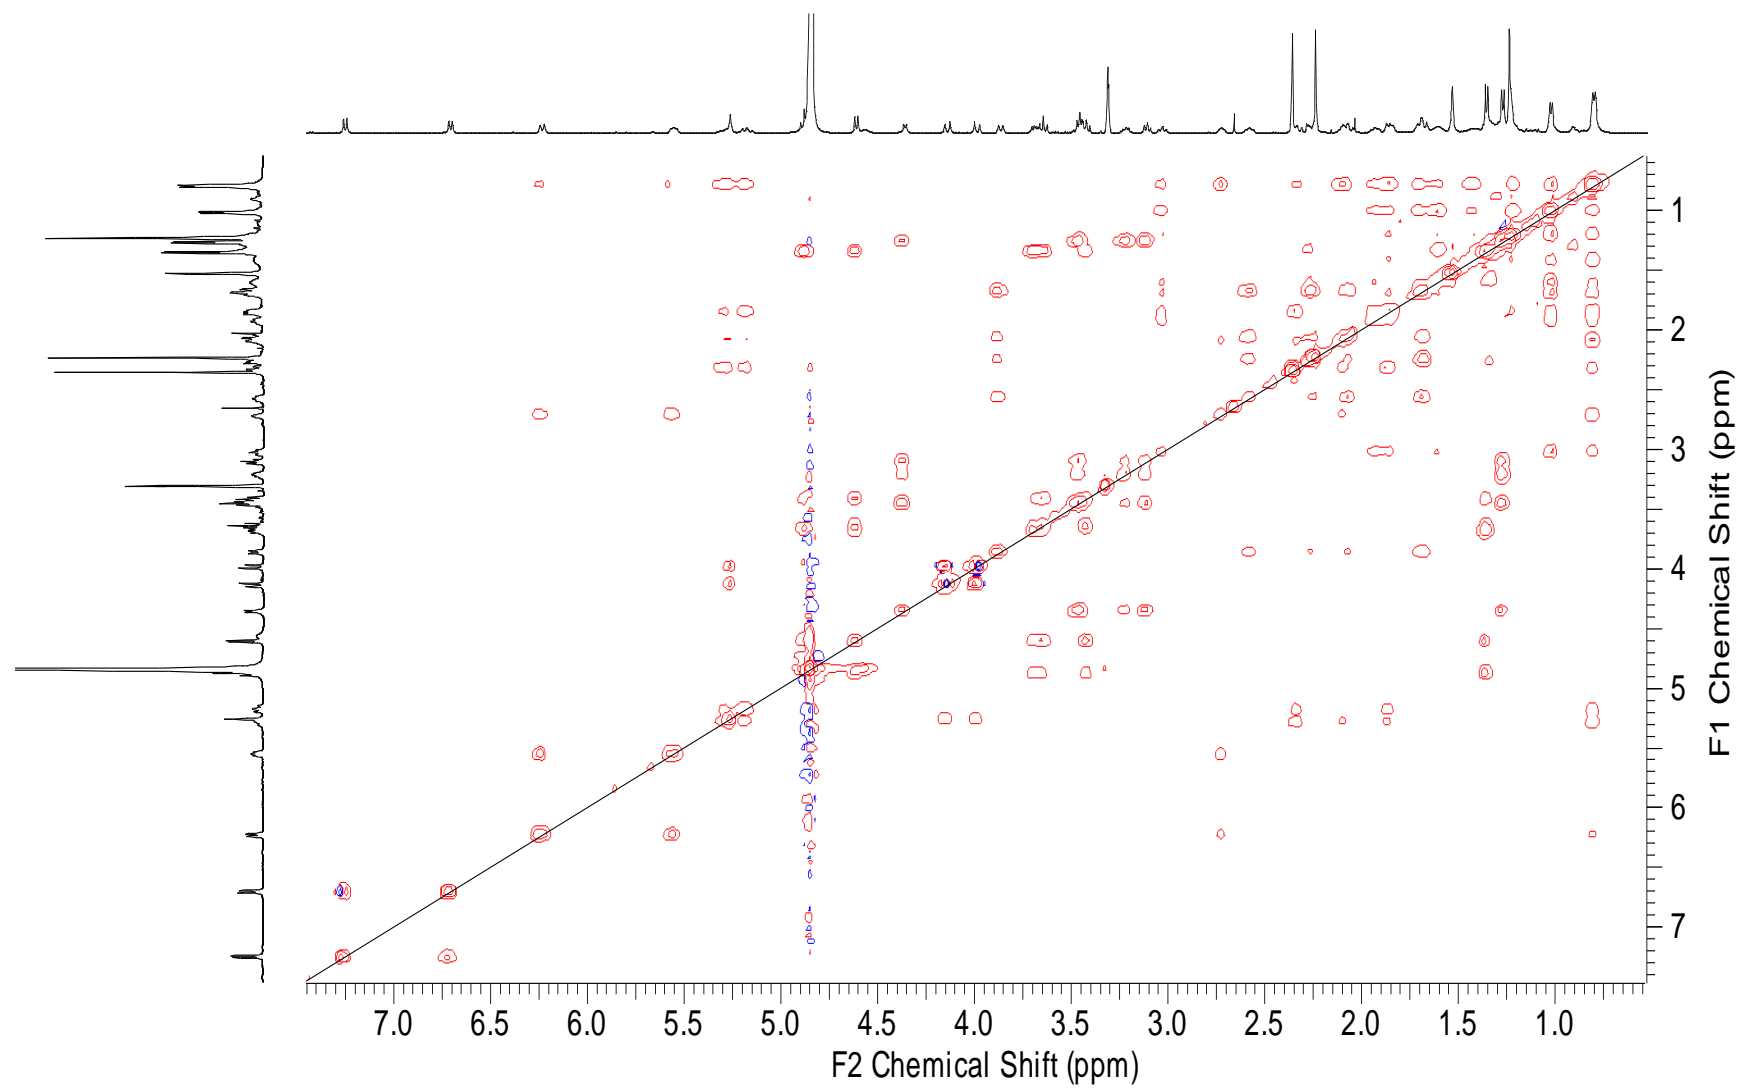

**Figure S11.** TOCSY (methanol- $d_4$ ) spectrum of phocoenamycin B (**1**).

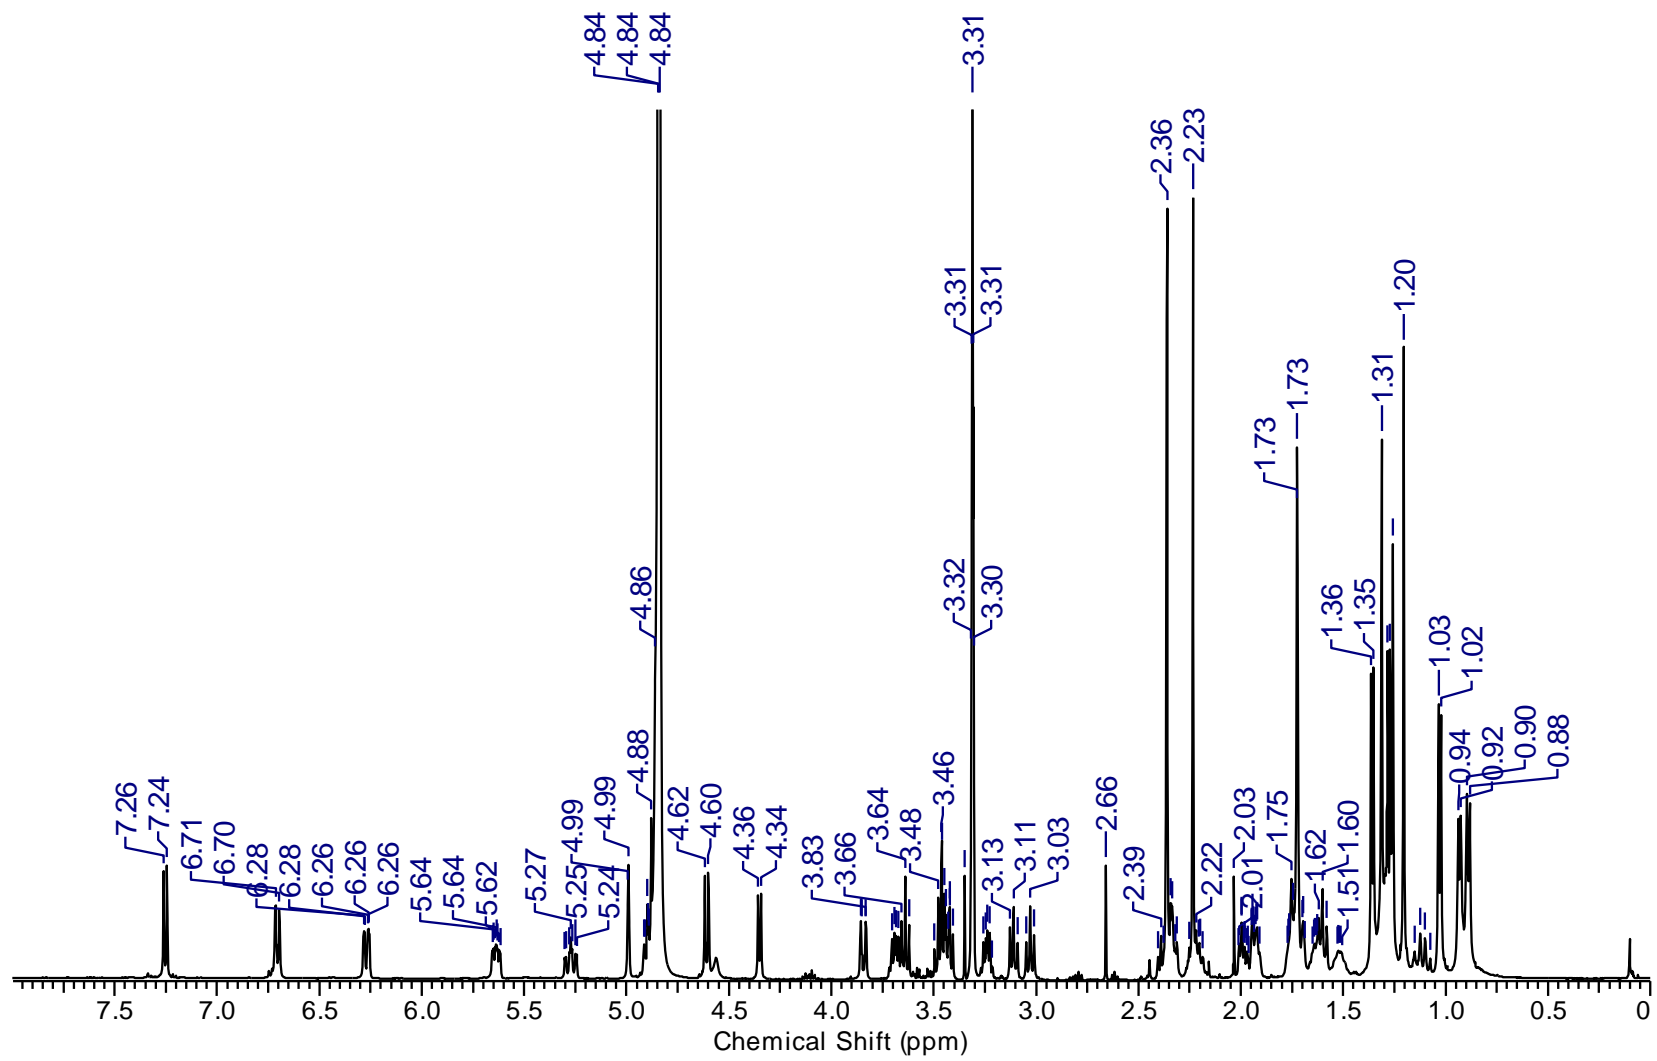

Figure S12.  $^1\text{H-NMR}$  (500 MHz, methanol- $d_4$ ) spectrum of phocoenamycin C (2).

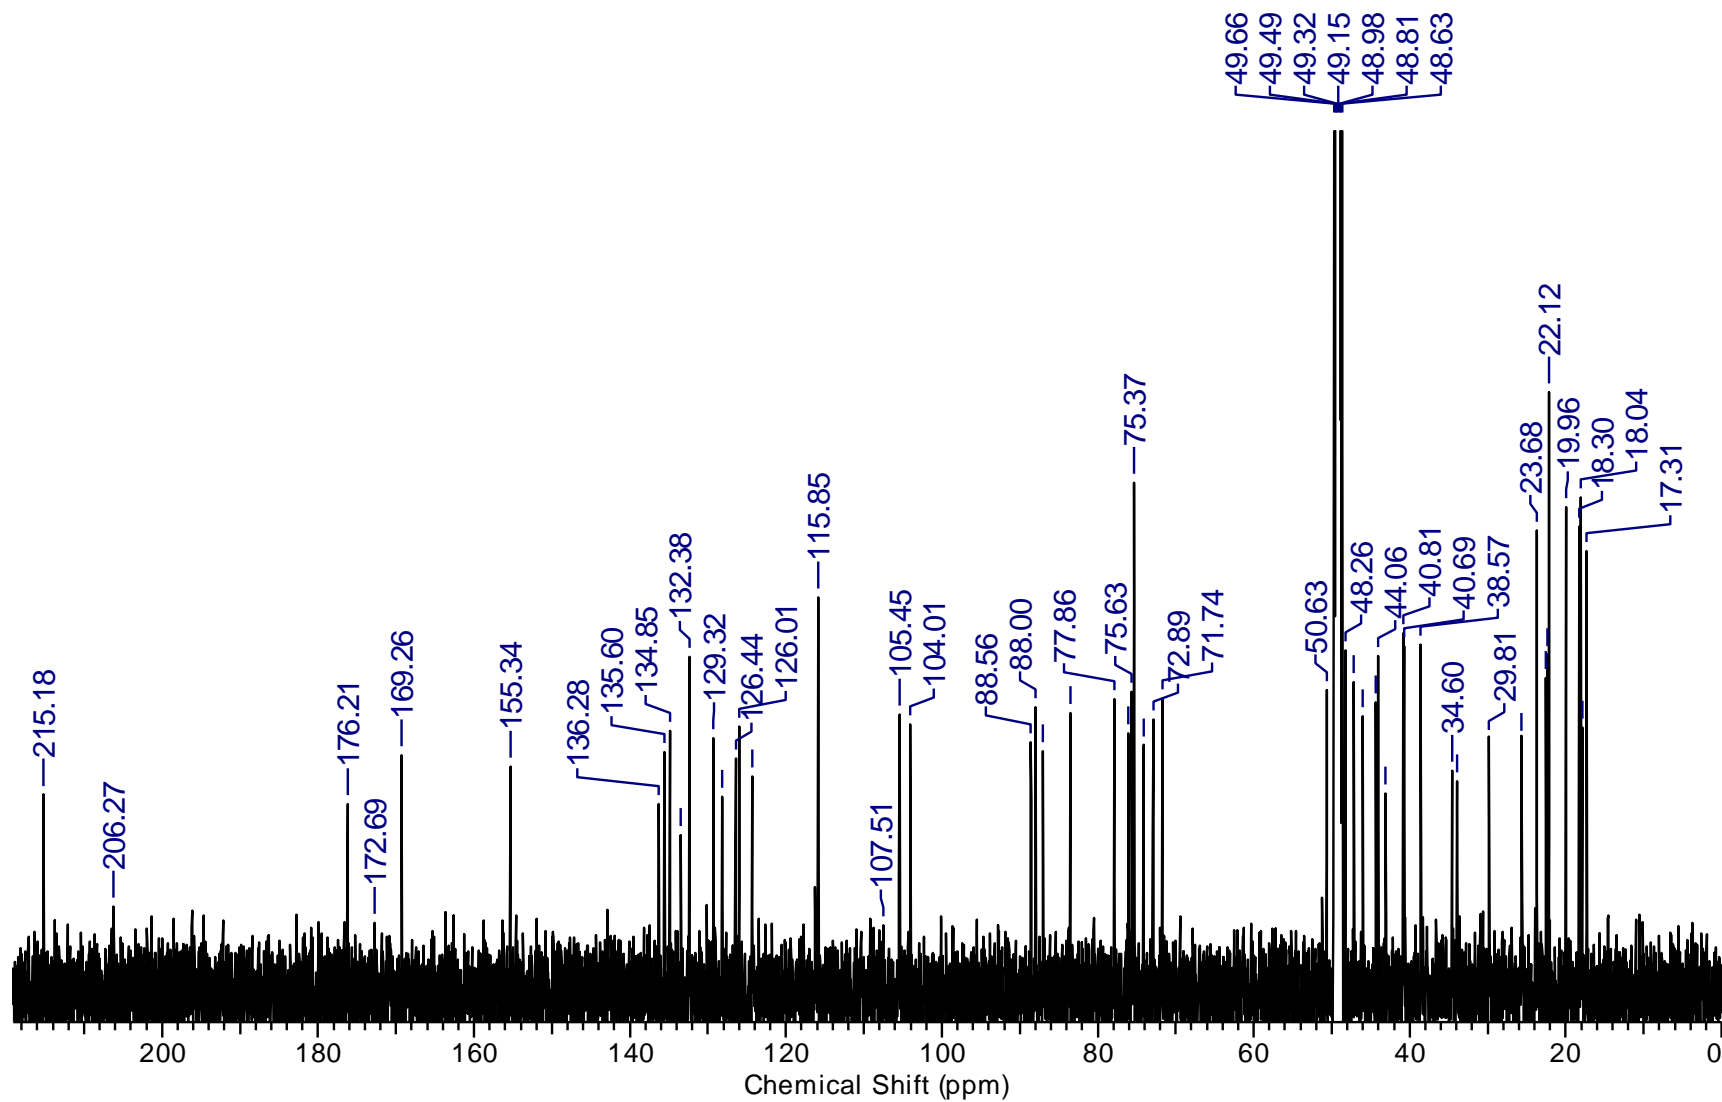

Figure S13.  $^{13}\text{C}$ -NMR (125 MHz, methanol- $d_4$ ) spectrum of phocoenamicin C (2).

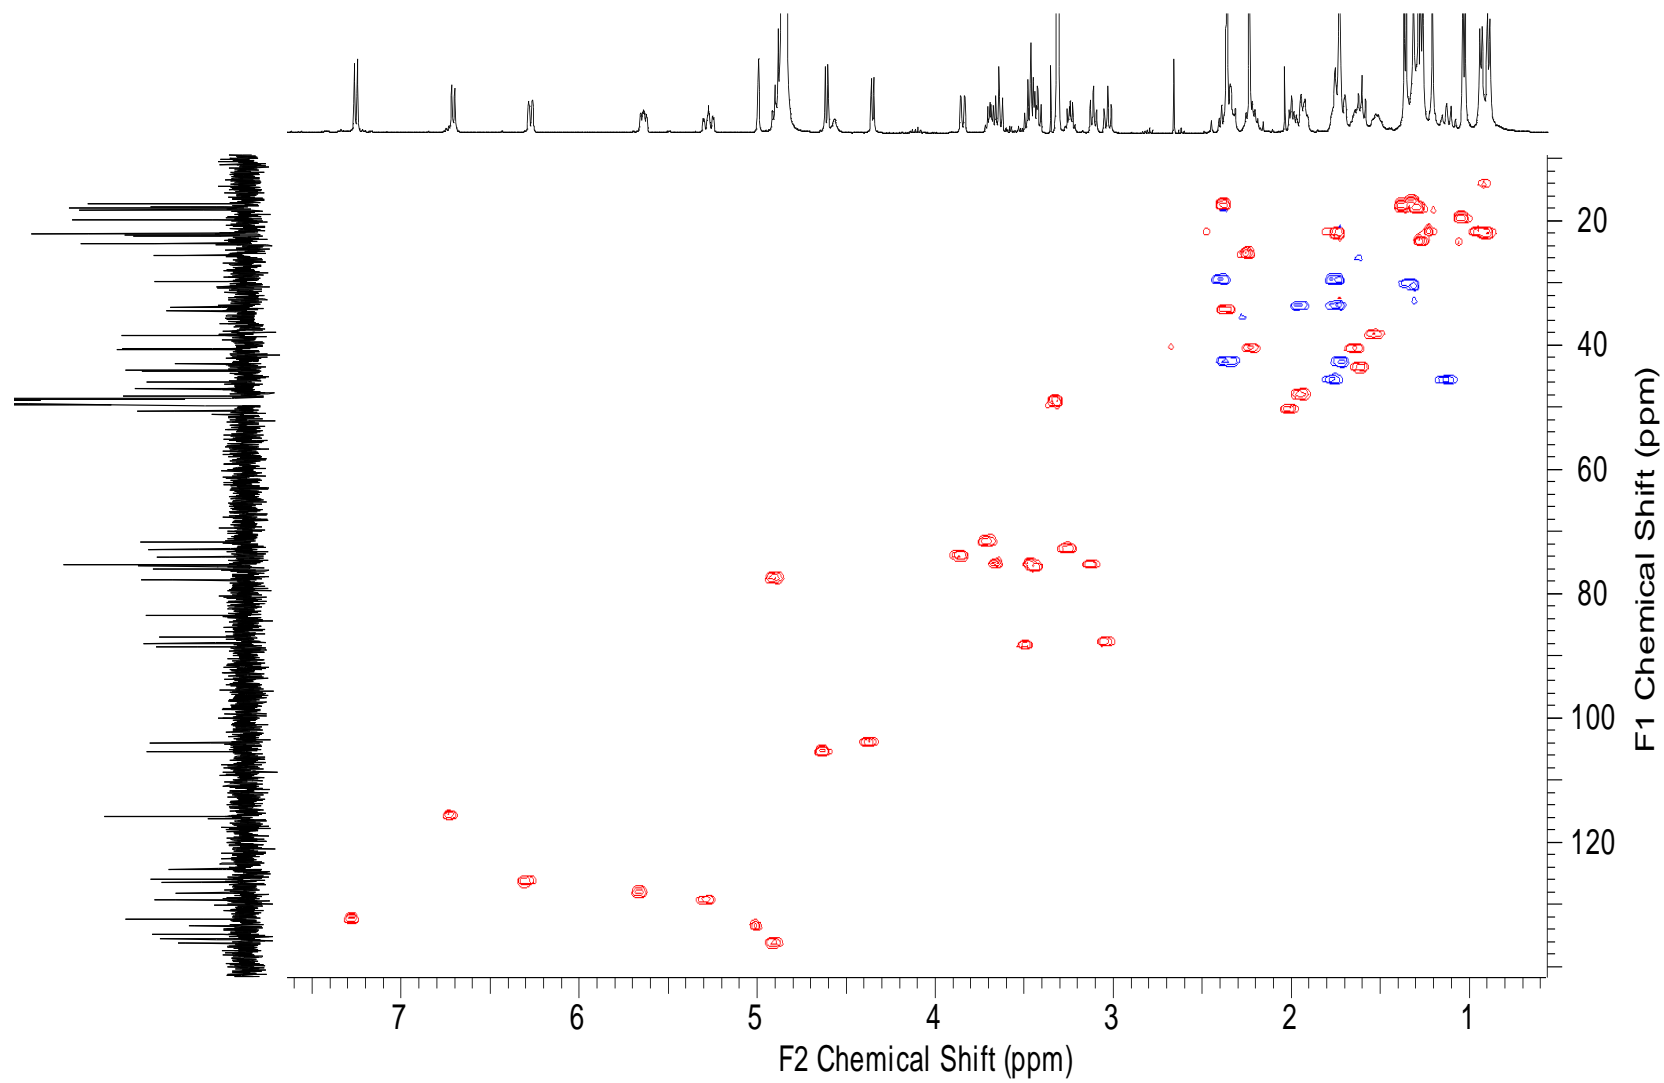

**Figure S14.** HSQC (methanol-*d*<sub>4</sub>) spectrum of phocoenamicin C (2).

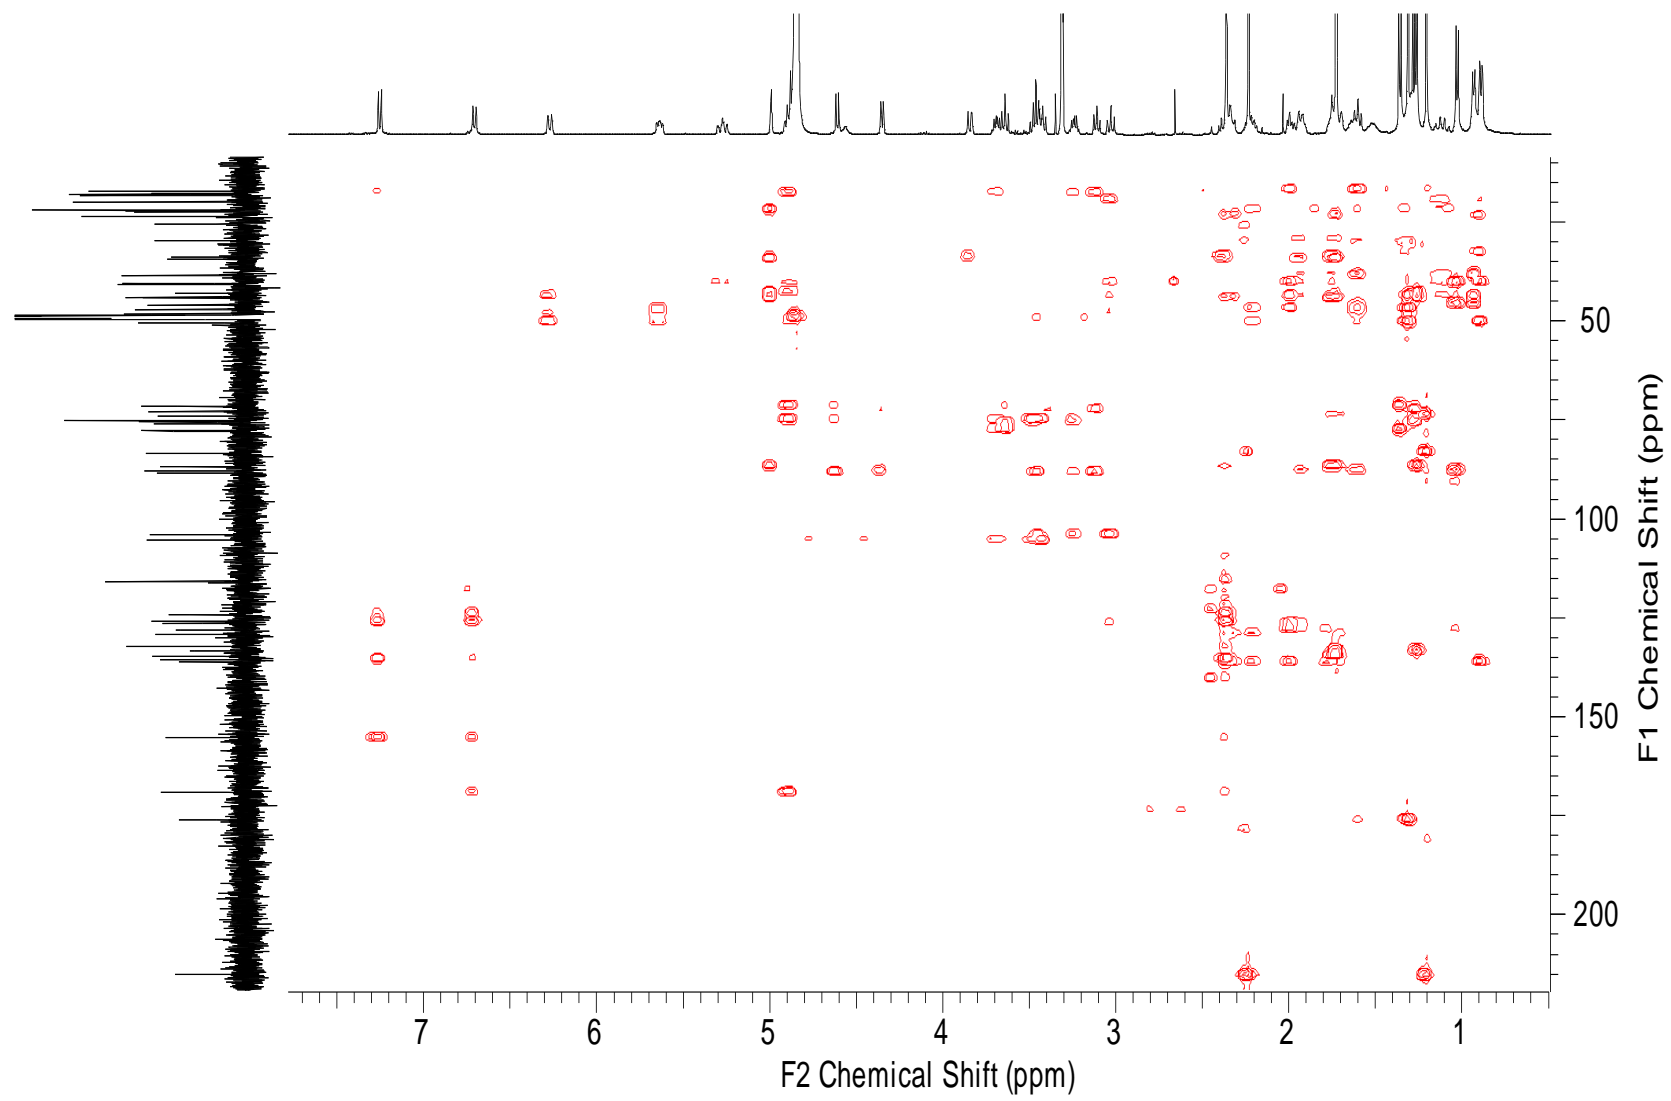

Figure S15. HMBC (methanol-*d*<sub>4</sub>) spectrum of phocoenamycin C (2).



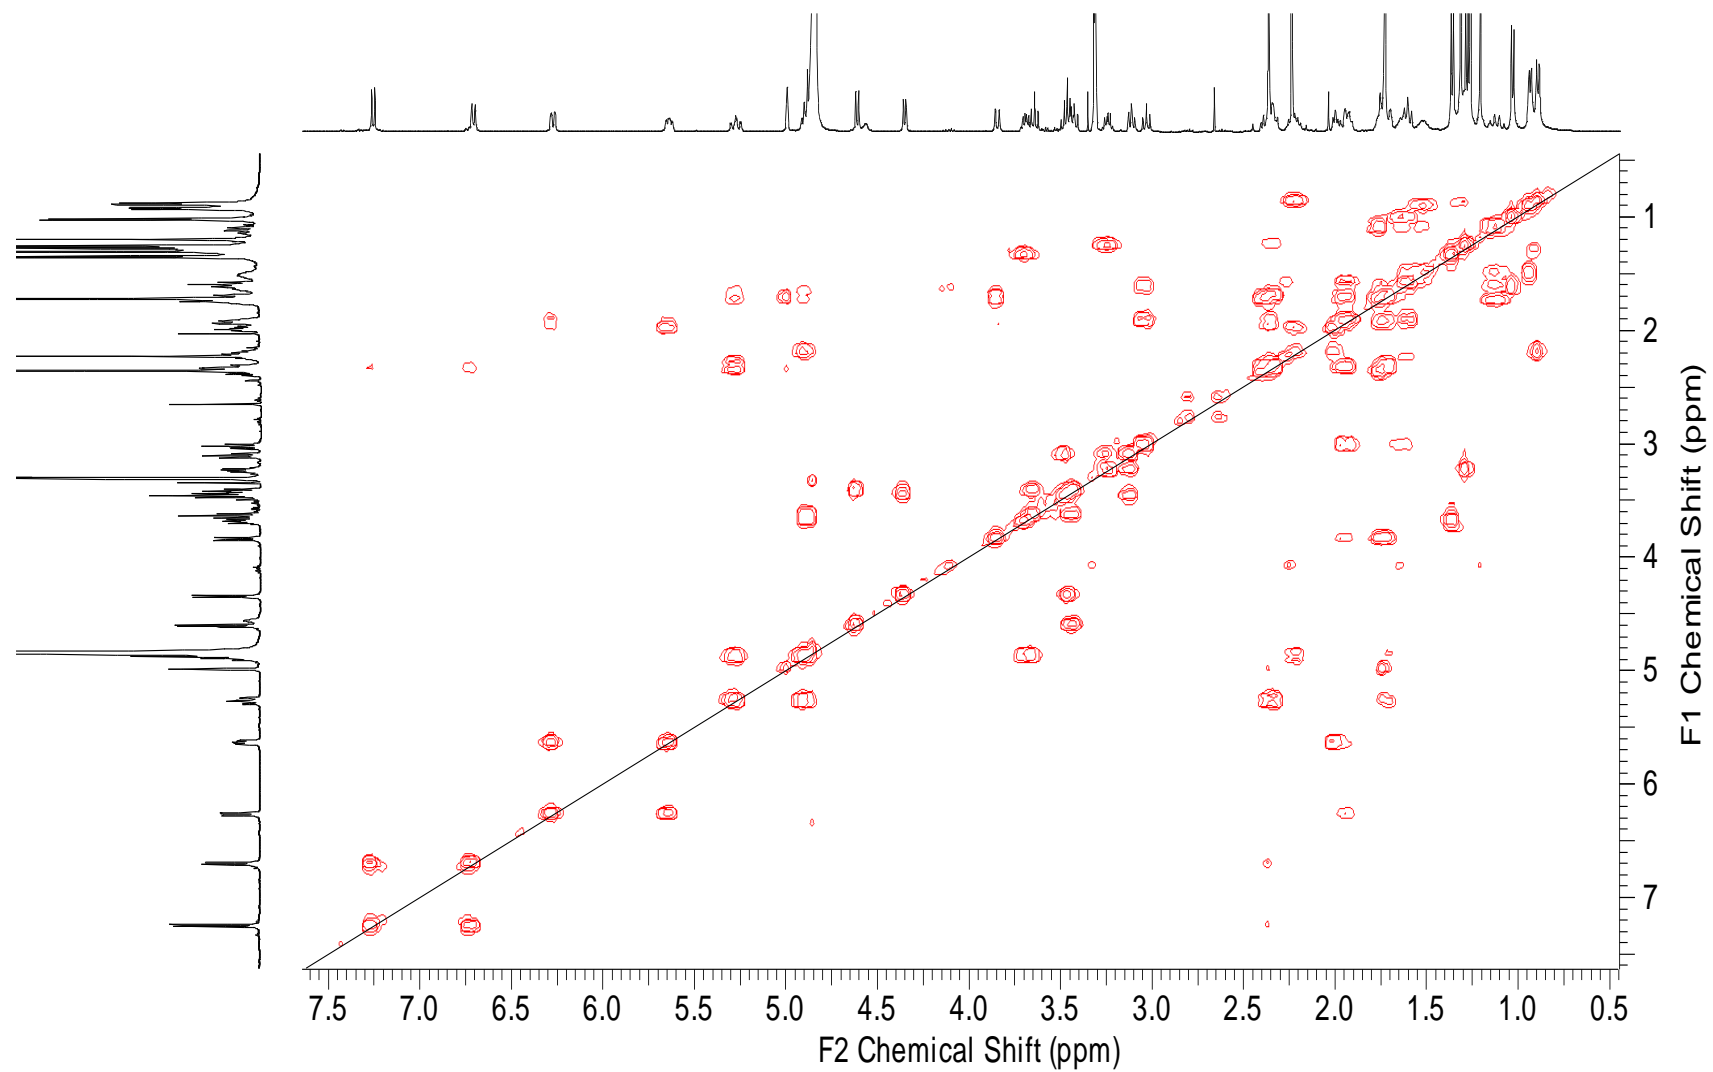

**Figure S16.** COSY (methanol- $d_4$ ) spectrum of phocoenamycin C (2).

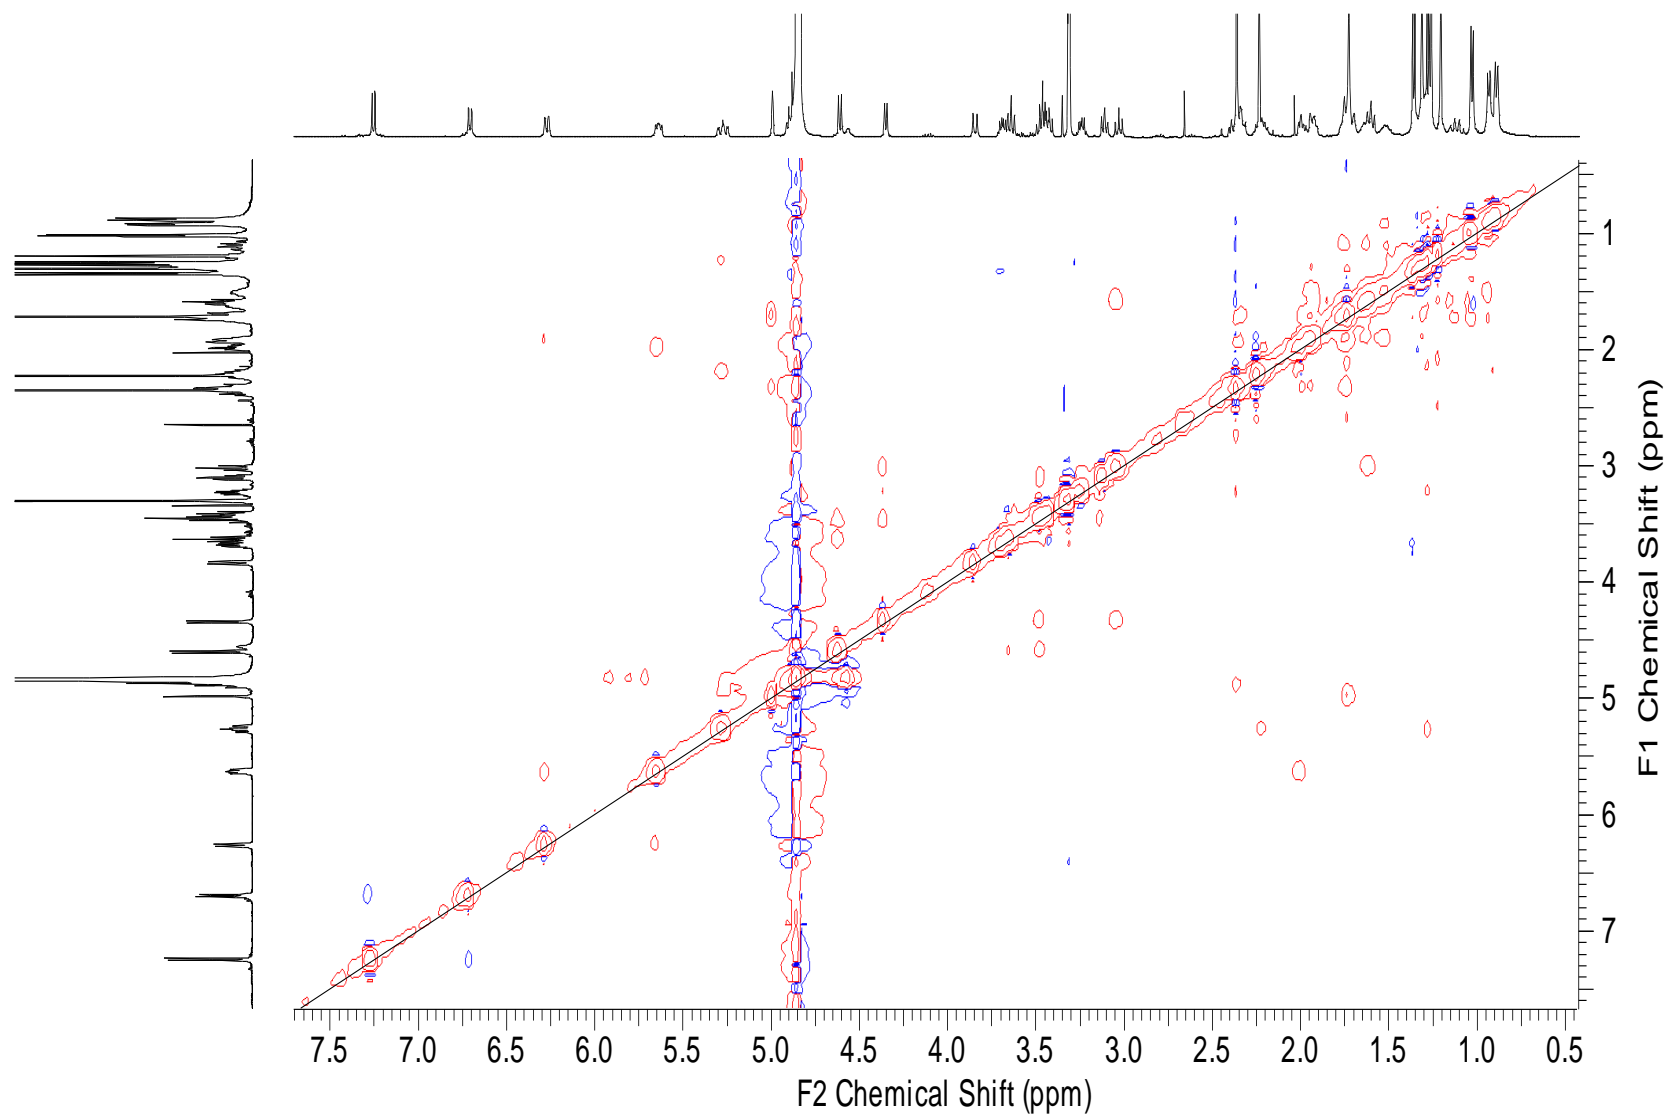

**Figure S17.** NOESY (methanol-*d*<sub>4</sub>) spectrum of phocoenamycin C (2).

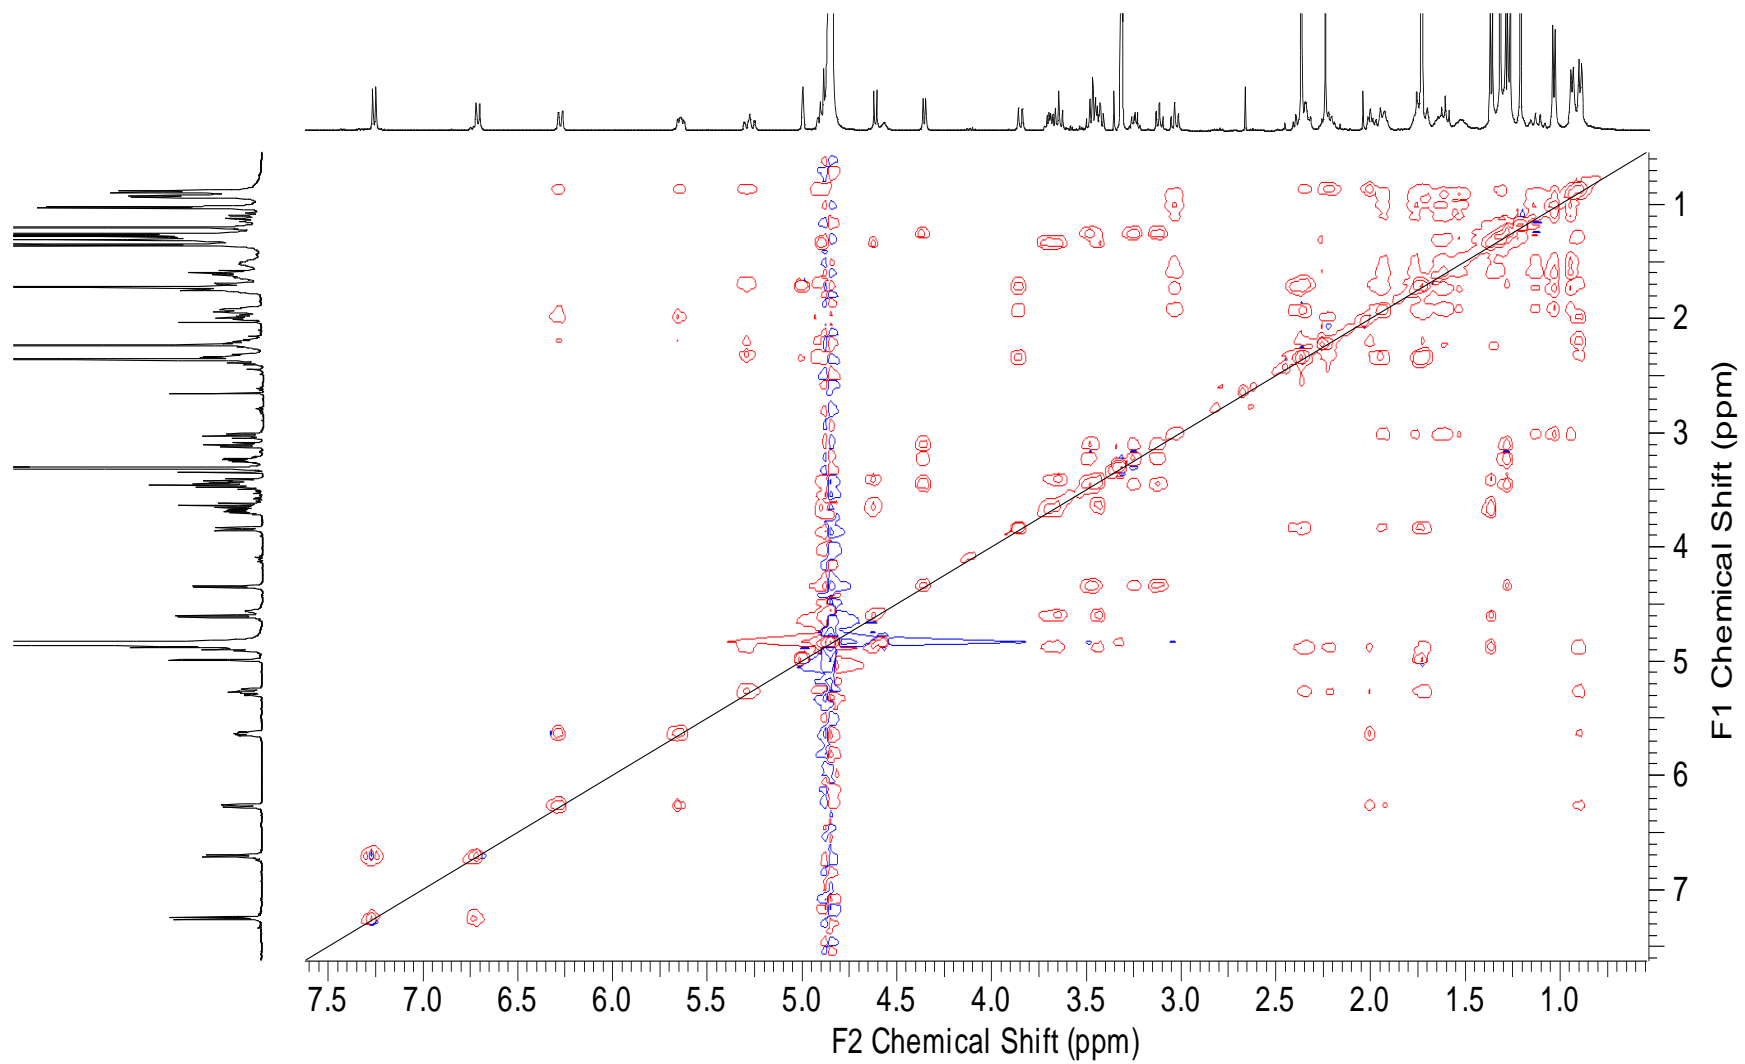

**Figure S18.** TOCSY (methanol- $d_4$ ) spectrum of phocoenamycin C (2).
